# Supplementary material for: Oxygen environment and islet size are the primary limiting factors of isolated pancreatic islet survival
Source: PubMed Central journal article supplement (PMC5568442; doi:10.1371/journal.pone.0183780), 2017-08-23

pO<sub>2</sub> = 50 mmHg

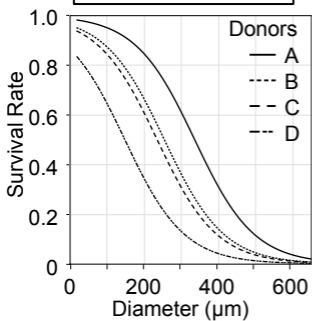

pO<sub>2</sub> = 150 mmHg

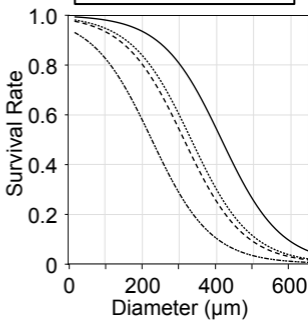

pO<sub>2</sub> = 250 mmHg

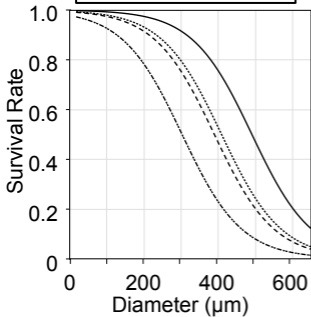

pO<sub>2</sub> = 350 mmHg

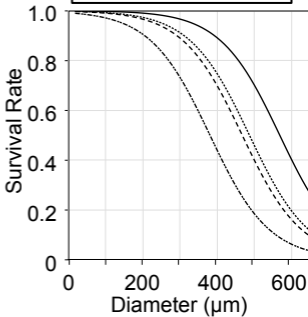

Supplement: pone.0183780.s003.pdf [file pone.0183780.s003.pdf]
